# Supplementary material
Source: HighWire-hosted journal article supplement (https://gut.bmj.com/content/gutjnl-2020-323219)
Supplement: inline-supplementary-material-7 [file inline-supplementary-material-7.pdf]

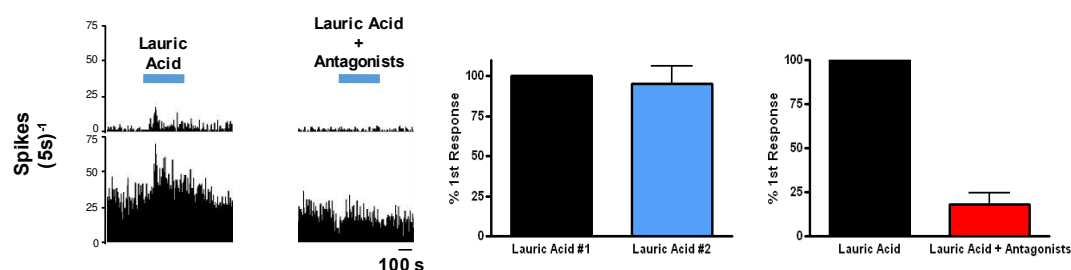

**Supplementary Figure 6: Afferent excitation by lauric acid is blocked by a combination of antagonists.**

Responses of afferent units to intraluminal perfusion with LA (25mM) are reproducible on second presentation, but absent after pre-administration of all three antagonists together with final concentrations - Granisetron (1 $\mu$ M), CYM 9484 (2 $\mu$ M) and Exendin 3-39 (100nM), ( $p=0.05$ , N=4-10).
